# Supplementary material for: Polydopamine stabilizes silver nanoparticles as a SERS substrate for efficient detection of myocardial infarction
Source: Royal Society of Chemistry journal article supplement (doi:10.1039/d2nr00091a), 2022-01-01
Supplement: d2nr00091a1.pdf [file d2nr00091a1.pdf]

## Supporting Information

### Polydopamine Stabilizes Silver Nanoparticles as SERS Substrate for Efficient Detection of Myocardial Infarction

Ding Wang, Liping Bao, Huijun Li, Xiaoyu Guo, Weizhuo Liu, Xianying Wang, Xumin Hou, Bin He

**Synthesis of PS@Ag** First, take 0.5 mL of polystyrene solution, centrifuge 2-3 times with 4 mL of ethanol, and disperse in 0.5 mL of H<sub>2</sub>O for the last time. Second, it was added to 80 mL of 98% H<sub>2</sub>SO<sub>4</sub>, and after ultrasonic dispersion, it was magnetically stirred at 100 rpm for 4 h at 40 °C. Then, they were washed with ethanol by centrifugation at 10,000 rpm and dispersed in ethanol. Then, the above solution and 0.1 g of polyvinylpyrrolidone were dissolved in 20 mL of ethanol, and Ag(NH<sub>3</sub>)<sub>2</sub><sup>+</sup> solution was added at 450 rpm, and the reaction was stirred at room temperature for 1 h, followed by magnetic stirring in an oil bath at 70 °C for 7 h. Finally, it was washed with ethanol by centrifugation at 10,000 rpm and dispersed in ethanol, and the solution finally turned gray.

**Synthesis of Ag@PDA** Take 2 mL of the prepared Ag NPs, add it to 40 mL of H<sub>2</sub>O, add 3 mL of 1.5 M Tris HCl and 2 mg/mL of 10 mL of DA aqueous solution, and react for 24 h. Centrifuge at 12,000 rpm for 15 min twice, and finally disperse in 10 ml H<sub>2</sub>O.

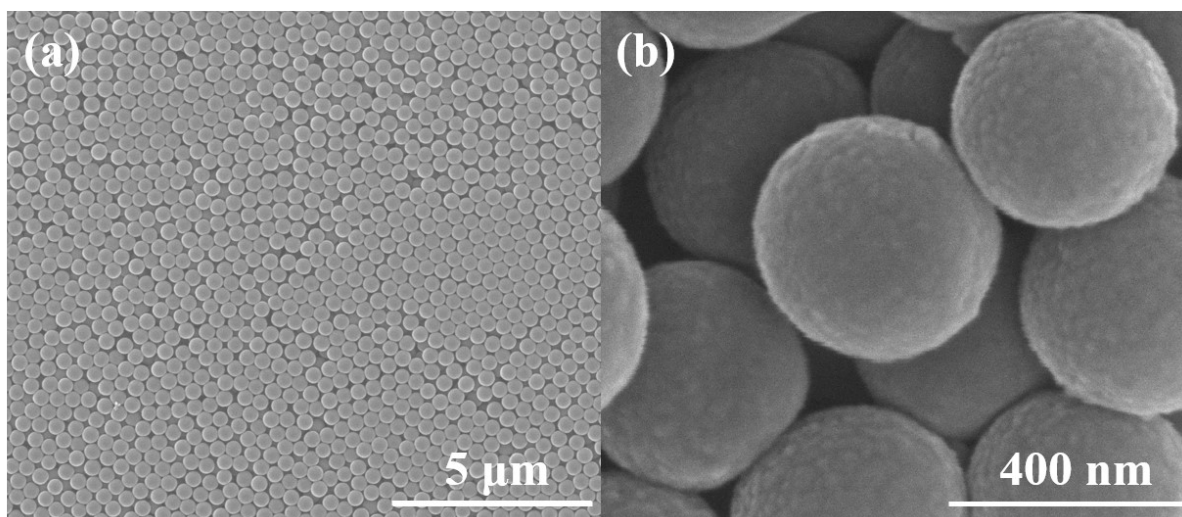

**Figure S1** SEM images of PDA at scale of (a) 20 μm and (b) 400 nm.

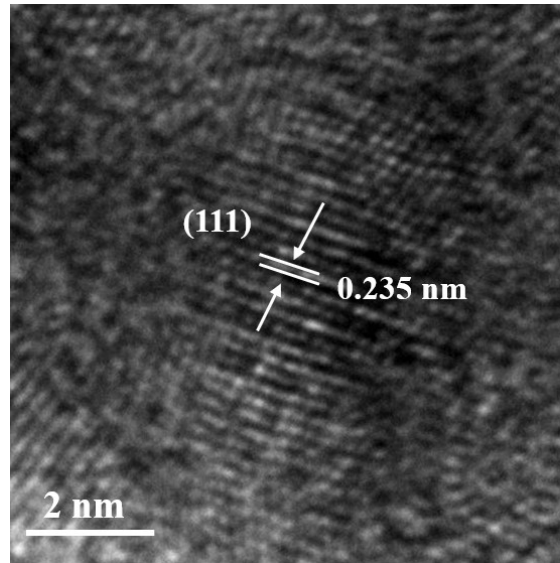

**Figure S2** Enlarged image of fringe spacing of an individual Ag nanoparticle in PDA@Ag nanocomposites.

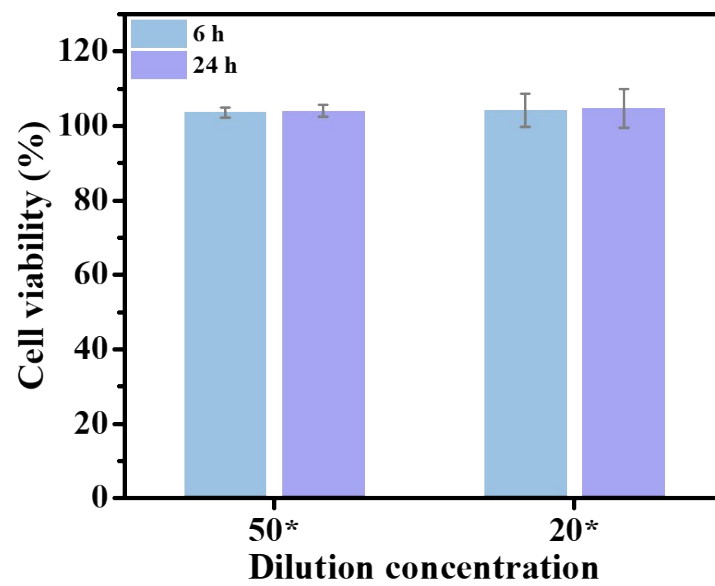

**Figure S3** Cell viability of PDA@Ag under different dilution concentration after 6 h and 24 h.

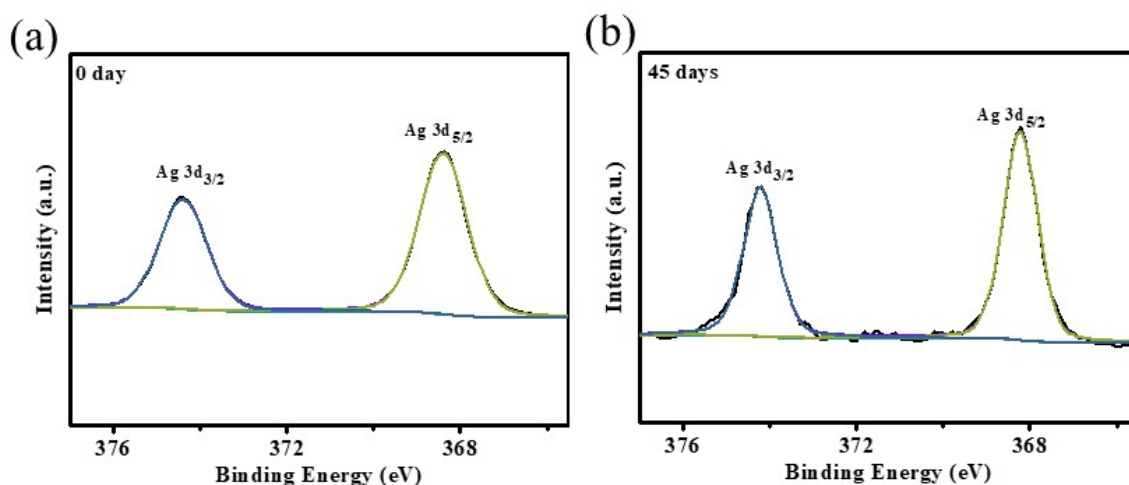

**Figure S4** High-resolution XPS spectra of Ag3d in (a) fresh-prepared PDA@Ag and (b) 45 days-stored PDA@Ag.

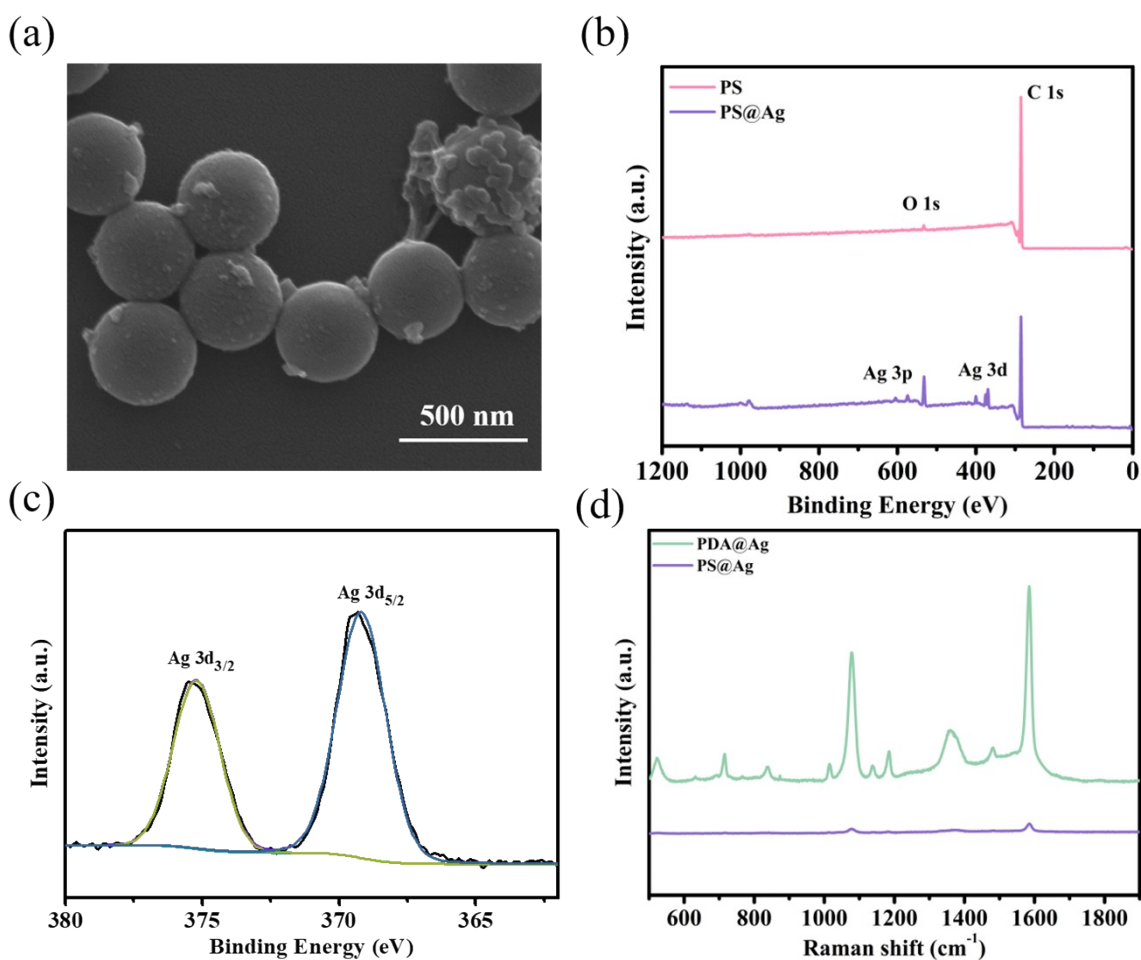

**Figure S5** (a) SEM image of PS@Ag; (b) XPS spectrum of PS and PS@Ag; (c) High-resolution XPS spectrum of Ag3d in PS@Ag; (d) Raman spectrum of 60 mM 4-MBA on PS@Ag and PDA@Ag.

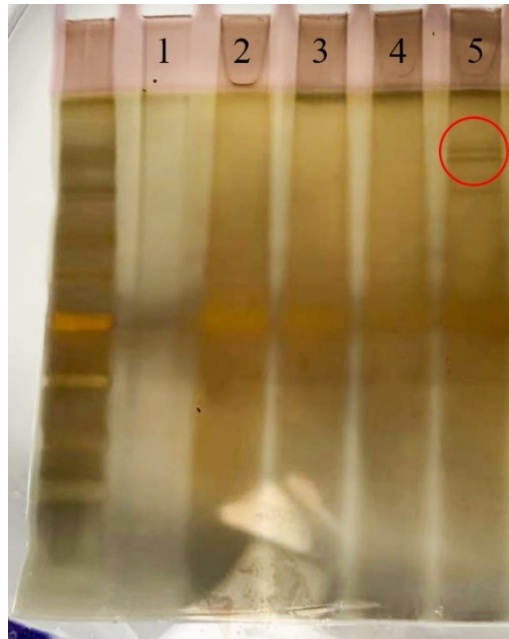

**Figure S6** Comparison of electrophoresis results according to the materials in the synthesis. (The materials used in the electrophoresis of bands No. 1-5 are as follows: 1.PDA@Ag; 2.PDA@Ag + 4-MBA; 3.PDA@Ag + 4-MBA + SH-PEG-COOH; 4.PDA@Ag + 4-MBA + SH-PEG-COOH + EDC/NHS; 5.PDA@Ag + 4-MBA + SH-PEG-COOH+ EDC/NHS + Antibody)

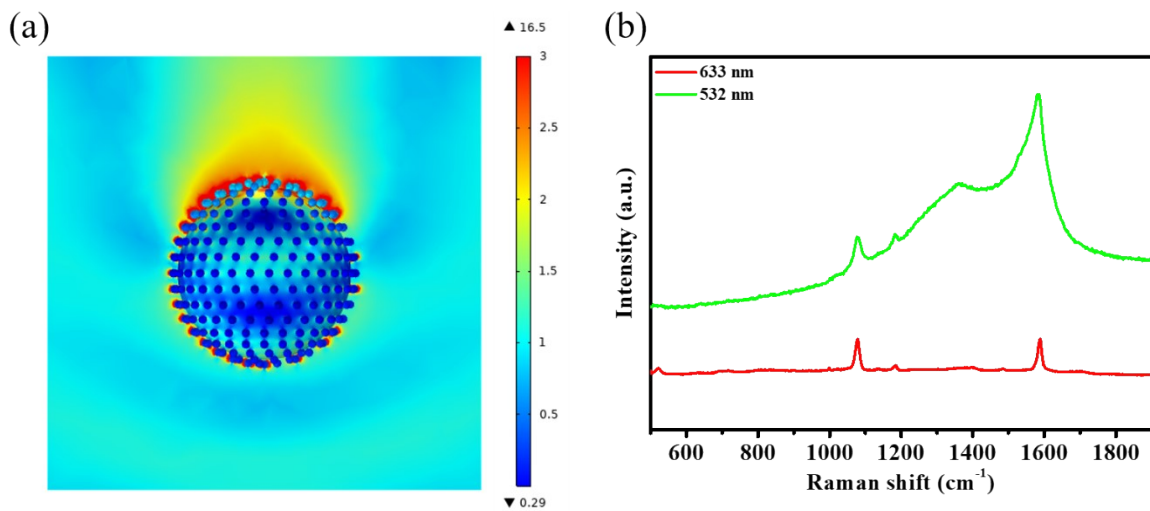

**Figure S7** (a) Electrical field distributions of regularly distributed Ag NPs on the PDA. (The light source is 532 nm wavelength) (b) Raman spectrum of standard cTn I samples on PDA@Ag under 532 nm and 633 nm laser.

**Table S1** Determination of cTn I in Human Serum Samples with the proposed method.

| Sample NO. | Spiked<br>Concentration<br>(ng/mL) | Detection<br>Concentration<br>(ng/mL) | Recovery<br>(%) | CV<br>(%) |
|------------|------------------------------------|---------------------------------------|-----------------|-----------|
| 1          | 0.037                              | 0.018                                 | 49.89%          | 10.96%    |
| 2          | 0.045                              | 0.021                                 | 46.83%          | 0.83%     |
| 3          | 0.200                              | 0.090                                 | 44.78%          | 1.97%     |
| 4          | 0.289                              | 0.136                                 | 47.04%          | 4.58%     |
| 5          | 0.717                              | 0.329                                 | 45.84%          | 10.10%    |
| 6          | 0.840                              | 0.536                                 | 63.76%          | 3.53%     |
| 7          | 1.044                              | 1.049                                 | 100.48%         | 4.45%     |
| 8          | 1.619                              | 1.269                                 | 78.41%          | 5.37%     |
| 9          | 2.610                              | 2.141                                 | 82.04%          | 6.51%     |
| 10         | 2.903                              | 2.397                                 | 82.57%          | 9.53%     |
| 11         | 6.253                              | 2.768                                 | 44.26%          | 5.85%     |
| 12         | 8.697                              | 9.466                                 | 108.84%         | 1.76%     |
| 13         | 9.887                              | 13.725                                | 138.82%         | 4.94%     |
| 14         | 10.731                             | 16.230                                | 151.24%         | 3.21%     |
